# Supplementary material for: Gut translocation of antimicrobial resistant pathogens in patients undergoing haematopoietic stem cell transplantation in India
Source: Research Square preprint supplement (doi:10.21203/rs.3.rs-7763072/v1), 2025-10-21
Supplement: Supplementary file 1 [file b34a2b51bd448e7ad0eb1d8f.docx]

**Extended data: Gut translocation of antimicrobial resistant pathogens in patients undergoing haematopoietic stem cell transplantation in India**

**Extended data 1: Random forest classification to identify main clinical predictors of discharge post-HSCT**

**
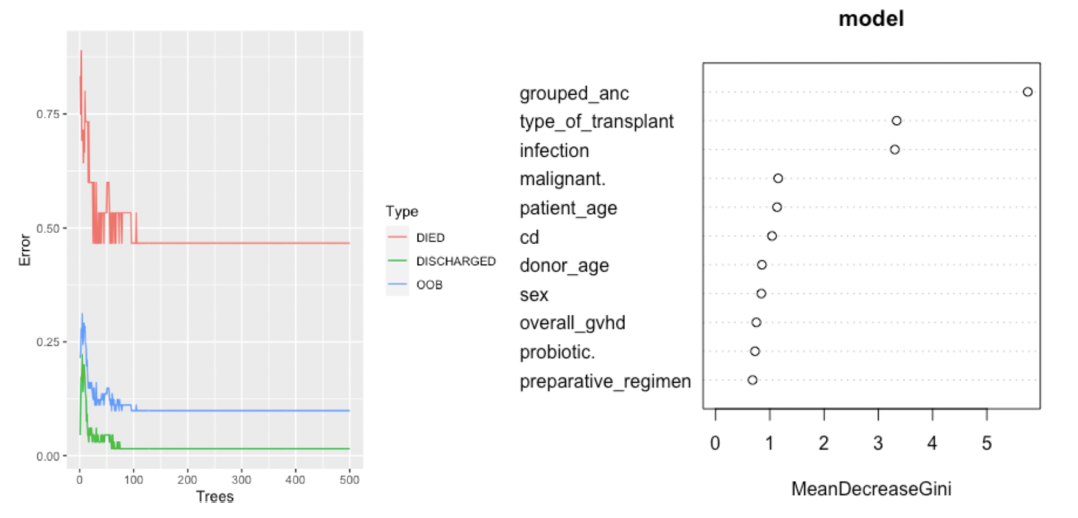
**

**A) Out-of-bag error rates in Random Forest classification algorithm**. Red line depicts the model’s error in predicting patients who died based on available clinical variables and the number of bootstrapped decision trees, green line depicts the error in predicting patients who were discharged. Blue line depicts the overall accuracy of the model. **B)** **Random Forest model weighing the importance of clinical variables on transplant outcome.** The model showed that the absolute neutrophil count recovery date was the most important predictor of outcome post HSCT. Occurrence of post-transplant infection episodes and a haploidentical transplant type were also associated with worse outcomes in our patient cohort.

**Extended data 2: Summary of all clinically significant organisms detected post-HSCT**

| **Patient number** | **Clinically significant organism** | **Source** | **Day** |
| --- | --- | --- | --- |
| 1 | *CONS* | Blood | 64 |
| 2 | *E. coli* | Blood | 5 |
| 5 | *Enterococcus faecium* | Blood | 14 |
| 5 | *Chryseobacterium indologenes* | Blood | 27 |
| 10 | *Pseudomonas aeruginosa* | Blood | 56 |
| 14 | *Klebsiella pneumoniae* | Blood | 43 |
| 21 | *CONS* | Blood | 4 |
| 22 | *CONS* | Blood | 3 |
| 24 | *Pseudomonas aeruginosa* | Blood | 5 |
| 31 | *Klebsiella pneumoniae* | Blood | 3 |
| 41 | *CONS* | Blood | 12 |
| 43 | *CONS* | Blood | 94 |
| 44 | *Pseudomonas aeruginosa* | Blood | 12 |
| 53 | *Enterococcus faecium* | Blood | 35 |
| 53 | *Acinetobacter baummannii* | Blood | 75 |
| 53 | *Stenotrophomonas maltophila* | Blood | 91 |
| 61 | *E. coli* | Blood | 2 |
| 75 | *Klebsiella pneumoniae* | Blood | 8 |
| 79 | *Ralstonia manitolytica* | Blood | 2 |
| 81 | *Klebsiella pneumoniae* | Blood | 7 |
| 26 | *CONS* | CLABSI | 39 |
| 70 | *CONS* | CLABSI | 3 |
| 66 | *Acinetobacter baumannii* | CRBSI | 18 |
| 10 | *Clostridioides difficile* | Stool | 32 |
| 12 | *Clostridioides difficile* | Stool | 28 |
| 18 | *Clostridioides difficile* | Stool | 35 |
| 25 | *Clostridioides difficile* | Stool | 14 |
| 26 | *Clostridioides difficile* | Stool | 37 |
| 29 | *Clostridioides difficile* | Stool | 18 |
| 40 | *Clostridioides difficile* | Stool | 7 |
| 42 | *Clostridioides difficile* | Stool | 17 |
| 50 | *Clostridioides difficile* | Stool | 158 |
| 57 | *Clostridioides difficile* | Stool | 15 |
| 60 | *Clostridioides difficile* | Stool | 111 |
| 15 | *E. coli* | Urine | 8 |
| 33 | *Enterococcus faecium* | Urine | 26 |
| 33 | *Acinetobacter baummannii* | VAP | 57 |
| 83 | *Pseudomonas aeruginosa* | VAP | 6 |

**Extended data 3: Shannon alpha-diversity at species-level**


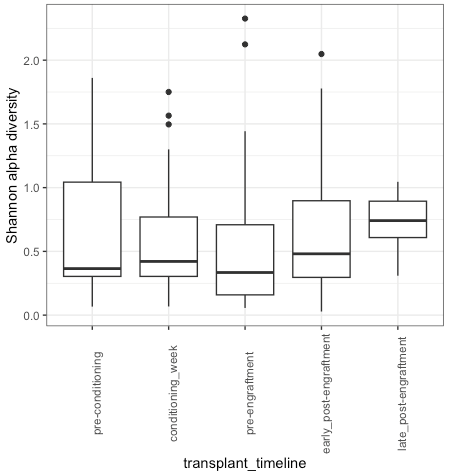


**Extended data 4: Significance tests for beta diversity (ANOSIM and pairwise adonis)**


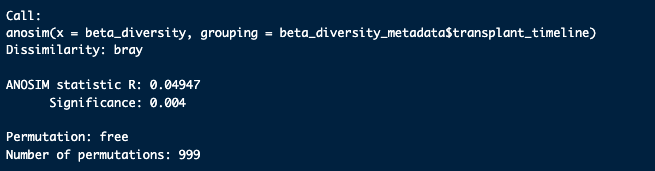


$parent_call

[1] "beta_dist_2[, 1:252] ~ transplant_timeline , strata = Null , permutations 9999"

$`pre-engraftment_vs_early_post-engraftment`

Df SumOfSqs R2 F Pr(>F)

transplant_timeline 1 0.1190 0.01572 2.46 0.11

Residual 154 7.4476 0.98428

Total 155 7.5666 1.00000

$`pre-engraftment_vs_conditioning_week`

Df SumOfSqs R2 F Pr(>F)

transplant_timeline 1 1.2100 0.15624 30.554 0.001 ***

Residual 165 6.5341 0.84376

Total 166 7.7441 1.00000

---

Signif. codes: 0 ‘***’ 0.001 ‘**’ 0.01 ‘*’ 0.05 ‘.’ 0.1 ‘ ’ 1

$`pre-engraftment_vs_pre-conditioning`

Df SumOfSqs R2 F Pr(>F)

transplant_timeline 1 0.0776 0.01515 1.5231 0.205

Residual 99 5.0437 0.98485

Total 100 5.1213 1.00000

$`pre-engraftment_vs_late_post-engraftment`

Df SumOfSqs R2 F Pr(>F)

transplant_timeline 1 0.0654 0.01405 1.3248 0.272

Residual 93 4.5921 0.98595

Total 94 4.6575 1.00000

$`early_post-engraftment_vs_conditioning_week`

Df SumOfSqs R2 F Pr(>F)

transplant_timeline 1 0.5794 0.10514 16.802 0.001 ***

Residual 143 4.9310 0.89486

Total 144 5.5104 1.00000

---

Signif. codes: 0 ‘***’ 0.001 ‘**’ 0.01 ‘*’ 0.05 ‘.’ 0.1 ‘ ’ 1

$`early_post-engraftment_vs_pre-conditioning`

Df SumOfSqs R2 F Pr(>F)

transplant_timeline 1 0.0111 0.0032 0.2474 0.698

Residual 77 3.4406 0.9968

Total 78 3.4516 1.0000

$`early_post-engraftment_vs_late_post-engraftment`

Df SumOfSqs R2 F Pr(>F)

transplant_timeline 1 0.10819 0.03493 2.57 0.107

Residual 71 2.98897 0.96507

Total 72 3.09716 1.00000

$`conditioning_week_vs_pre-conditioning`

Df SumOfSqs R2 F Pr(>F)

transplant_timeline 1 0.09031 0.0345 3.1448 0.069 .

Residual 88 2.52710 0.9655

Total 89 2.61741 1.0000

---

Signif. codes: 0 ‘***’ 0.001 ‘**’ 0.01 ‘*’ 0.05 ‘.’ 0.1 ‘ ’ 1

$`conditioning_week_vs_late_post-engraftment`

Df SumOfSqs R2 F Pr(>F)

transplant_timeline 1 0.3976 0.16077 15.709 0.001 ***

Residual 82 2.0755 0.83923

Total 83 2.4731 1.00000

---

Signif. codes: 0 ‘***’ 0.001 ‘**’ 0.01 ‘*’ 0.05 ‘.’ 0.1 ‘ ’ 1

$`pre-conditioning_vs_late_post-engraftment`

Df SumOfSqs R2 F Pr(>F)

transplant_timeline 1 0.11804 0.16789 3.2282 0.074 .

Residual 16 0.58502 0.83211

Total 17 0.70306 1.00000

---

Signif. codes: 0 ‘***’ 0.001 ‘**’ 0.01 ‘*’ 0.05 ‘.’ 0.1 ‘ ’ 1

attr(,"class")

[1] "pwadstrata" "list"

**Extended data 5: Taxa contributing to shifts in diversity relative to HSCT timeline**


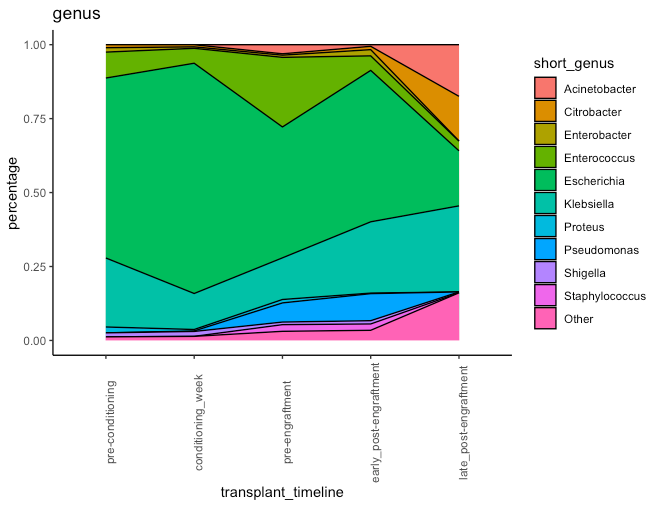


**Relative abundances of the 10 most abundant taxa detected in the enriched stool samples.** The relative abundance of *Escherichia* spiked during the conditioning week, accounting for 78.1% (403,582,054/516,955,793) of all OTUs assigned at that timepoint. At the pre-engraftment timepoint (n=586,882,141), the abundance of *Escherichia* dropped to 44.3% (260,182,871/586,882,141) of assigned OTUs and the relative abundance of *Enterococcus* peaked at 23.6% (n = 138,504,185) – representing the highest abundance of this genus throughout the transplant timeline. After neutrophil recovery in the early post-engraftment phase (n = 434,551,157), the abundance of *Enterococcus* declined to 4.93% relative abundance, but there was a notable increase in the abundance of *Klebsiella* (24.2%) and *Pseudomonas* (9.18%) compared to their abundances at the pre-transplant and pre-engraftment timepoints. At the late post-engraftment timepoint, *Escherichia* dropped to its lowest abundance (18.6%) compared to all previous timepoints. *Klebsiella* spp. dominate instead at the late post-engraftment timepoint, accounting for 29.1% of OTUs assigned at this timepoint (n = 36,390,898), followed by the *Acinetobacter* (17.5%) and *Citrobacter* (15.1%). Notably, organisms classified under the “Other” genera occupied the largest relative abundance at the late post-engraftment compared to previous timepoints, comprising 16.1% of all OTUs detected among samples collected at that timepoint.

**Extended data 6: Significance tests for AMR gene abundance and diversity relative to the transplant timeline**

| **Pairwise comparisons using t-tests with pooled SD** | | | | |
| --- | --- | --- | --- | --- |
| **P-value adjustment method: Bonferroni** | | | | |
|  |  |  |  |  |
| ***All AMR genes - abundance*** | | | | |
|  | *pre-conditioning* | *conditioning_week* | *pre-engraftment* | *early_post-engraftment* |
| *conditioning_week* | 1.00000 | - | - | - |
| *pre-engraftment* | 0.22524 | 0.00018 | - | - |
| *early_post-engraftment* | 1.00000 | 1.00000 | 0.00255 | - |
| *late_post-engraftment* | 1.00000 | 1.00000 | 0.11154 | 1.00000 |
|  |  |  |  |  |
| ***All AMR genes - diversity*** | | | | |
|  | *pre-conditioning* | *conditioning_week* | *pre-engraftment* | *early_post-engraftment* |
| *conditioning_week* | 1.00000 | - | - | - |
| *pre-engraftment* | 0.20278 | 0.00045 | - | - |
| *early_post-engraftment* | 1.00000 | 1.00000 | 0.00011 | - |
| *late_post-engraftment* | 1.00000 | 1.00000 | 0.41162 | 1.00000 |
|  |  |  |  |  |
| ***Non-efflux AMR genes - abundance*** | | | | |
|  | *pre-conditioning* | *conditioning_week* | *pre-engraftment* | *early_post-engraftment* |
| *conditioning_week* | 1.000 | - | - | - |
| *pre-engraftment* | 1.000 | 0.208 | - | - |
| *early_post-engraftment* | 1.000 | 1.000 | 0.003 | - |
| *late_post-engraftment* | 0.489 | 0.186 | 0.014 | 0.734 |
|  |  |  |  |  |
| ***Non-efflux AMR genes - diversity*** | | | | |
|  | *pre-conditioning* | *conditioning_week* | *pre-engraftment* | *early_post-engraftment* |
| *conditioning_week* | 1.00000 | - | - | - |
| *pre-engraftment* | 0.48991 | 0.01392 | - | - |
| *early_post-engraftment* | 1.00000 | 1.00000 | 0.00037 | - |
| *late_post-engraftment* | 1.00000 | 1.00000 | 0.30098 | 1.00000 |
|  |  |  |  |  |
| ***Non-efflux AMR genes - subset of participants with late post-engraftment samples*** | | | | |
|  | *pre-conditioning* | *conditioning_week* | *pre-engraftment* | *early_post-engraftment* |
| *conditioning_week* | 1.000 | - | - | - |
| *pre-engraftment* | 1.000 | 1.000 | - | - |
| *early_post-engraftment* | 1.000 | 1.000 | 0.801 | - |
| *late_post-engraftment* | 0.154 | 1.000 | 0.041 | 1.000 |
|  |  |  |  |  |
| ***ESBL/carbapenemase genes (blaOXA, blaTEM, blaNDM, bla,SHV, bla,CTX) - abundance*** | | | | |
|  | *pre-conditioning* | *conditioning_week* | *pre-engraftment* | *early_post-engraftment* |
| *conditioning_week* | 1.00000 | - | - | - |
| *pre-engraftment* | 1.00000 | 1.00000 | - | - |
| *early_post-engraftment* | 1.00000 | 0.00061 | 0.00888 | - |
| *late_post-engraftment* | 0.49984 | 0.06842 | 0.13554 | 1.00000 |

**Extended data 7: Hi-C AMR to host summary**

| **SampleID** | **gene_id** | **bin_id** | **origin** | **bin_taxonomy** | **mash_reference** | **origin_contig** | **origin_contig_length** | **gene_class** |
| --- | --- | --- | --- | --- | --- | --- | --- | --- |
| P02BT0031 | rmtB1 | bin_1 | plasmid | f__Enterobacteriaceae (UID5103) (bin_1) | Escherichia_coli_str._K_12_substr._MC4100.fna | NODE_1623_length_1929_cov_5.632337 | 1929 | AMINOGLYCOSIDE |
| P02BT0031 | aac(6')-Ib-cr5 | bin_1 | plasmid | f__Enterobacteriaceae (UID5103) (bin_1) | Escherichia_coli_str._K_12_substr._MC4100.fna | NODE_1685_length_1844_cov_41.626048 | 1844 | AMINOGLYCOSIDE/QUINOLONE |
| P02BT0031 | blaCMY-42 | bin_1 | plasmid | f__Enterobacteriaceae (UID5103) (bin_1) | Escherichia_coli_str._K_12_substr._MC4100.fna | NODE_1126_length_2803_cov_284.521470 | 2803 | BETA-LACTAM |
| P02BT0031 | blaCTX-M-15 | bin_1 | plasmid | f__Enterobacteriaceae (UID5103) (bin_1) | Escherichia_coli_str._K_12_substr._MC4100.fna | NODE_2116_length_1399_cov_575.293155 | 1399 | BETA-LACTAM |
| P02BT0031 | blaDHA-1 | bin_1 | plasmid | f__Enterobacteriaceae (UID5103) (bin_1) | Escherichia_coli_str._K_12_substr._MC4100.fna | NODE_352_length_7673_cov_88.611053 | 7673 | BETA-LACTAM |
| P02BT0031 | blaNDM-5 | bin_1 | plasmid | f__Enterobacteriaceae (UID5103) (bin_1) | Escherichia_coli_str._K_12_substr._MC4100.fna | NODE_536_length_5322_cov_133.444276 | 5322 | BETA-LACTAM |
| P02BT0031 | blaOXA-1 | bin_1 | plasmid | f__Enterobacteriaceae (UID5103) (bin_1) | Escherichia_coli_str._K_12_substr._MC4100.fna | NODE_1685_length_1844_cov_41.626048 | 1844 | BETA-LACTAM |
| P02BT0031 | blaOXA-232 | bin_1 | plasmid | f__Enterobacteriaceae (UID5103) (bin_1) | Escherichia_coli_str._K_12_substr._MC4100.fna | NODE_434_length_6203_cov_3332.689655 | 6203 | BETA-LACTAM |
| P02BT0031 | ble | bin_1 | plasmid | f__Enterobacteriaceae (UID5103) (bin_1) | Escherichia_coli_str._K_12_substr._MC4100.fna | NODE_536_length_5322_cov_133.444276 | 5322 | BLEOMYCIN |
| P02BT0031 | erm(B) | bin_1 | plasmid | f__Enterobacteriaceae (UID5103) (bin_1) | Escherichia_coli_str._K_12_substr._MC4100.fna | NODE_1336_length_2379_cov_16.043029 | 2379 | MACROLIDE |
| P02BT0031 | mph(A) | bin_1 | plasmid | f__Enterobacteriaceae (UID5103) (bin_1) | Escherichia_coli_str._K_12_substr._MC4100.fna | NODE_2433_length_1153_cov_312.689435 | 1153 | MACROLIDE |
| P02BT0031 | qacE | bin_1 | plasmid | f__Enterobacteriaceae (UID5103) (bin_1) | Escherichia_coli_str._K_12_substr._MC4100.fna | NODE_2471_length_1134_cov_340.784059 | 1134 | QUATERNARY AMMONIUM |
| P02BT0031 | qnrB4 | bin_1 | plasmid | f__Enterobacteriaceae (UID5103) (bin_1) | Escherichia_coli_str._K_12_substr._MC4100.fna | NODE_352_length_7673_cov_88.611053 | 7673 | QUINOLONE |
| P02BT0031 | qnrS1 | bin_1 | plasmid | f__Enterobacteriaceae (UID5103) (bin_1) | Escherichia_coli_str._K_12_substr._MC4100.fna | NODE_1339_length_2376_cov_52.355881 | 2376 | QUINOLONE |
| P02BT0031 | sul1 | bin_1 | plasmid | f__Enterobacteriaceae (UID5103) (bin_1) | Escherichia_coli_str._K_12_substr._MC4100.fna | NODE_2471_length_1134_cov_340.784059 | 1134 | SULFONAMIDE |
| P02BT0031 | sul3 | bin_1 | plasmid | f__Enterobacteriaceae (UID5103) (bin_1) | Escherichia_coli_str._K_12_substr._MC4100.fna | NODE_1053_length_2968_cov_95.952283 | 2968 | SULFONAMIDE |
| P02BT0031 | tet(A) | bin_1 | plasmid | f__Enterobacteriaceae (UID5103) (bin_1) | Escherichia_coli_str._K_12_substr._MC4100.fna | NODE_844_length_3565_cov_177.202564 | 3565 | TETRACYCLINE |
| P02BT0031 | tet(B) | bin_1 | plasmid | f__Enterobacteriaceae (UID5103) (bin_1) | Escherichia_coli_str._K_12_substr._MC4100.fna | NODE_927_length_3350_cov_69.841578 | 3350 | TETRACYCLINE |
| P02BT0031 | dfrA12 | bin_1 | plasmid | f__Enterobacteriaceae (UID5103) (bin_1) | Escherichia_coli_str._K_12_substr._MC4100.fna | NODE_2694_length_1023_cov_101.612603 | 1023 | TRIMETHOPRIM |
| P02BT0031 | dfrA17 | bin_1 | plasmid | f__Enterobacteriaceae (UID5103) (bin_1) | Escherichia_coli_str._K_12_substr._MC4100.fna | NODE_2717_length_1003_cov_215.528481 | 1003 | TRIMETHOPRIM |
| P05AT0063 | aac(6')-I | bin_1 | plasmid | o__Lactobacillales (UID544) (bin_1) | Enterococcus_faecium.fna | NODE_11_length_65008_cov_470.923098 | 65008 | AMINOGLYCOSIDE |
| P05AT0063 | ant(6)-Ia | bin_2 | plasmid | root (UID1) (bin_2) | Enterococcus_faecium_EnGen0180.fna | NODE_764_length_1339_cov_128.181464 | 1339 | AMINOGLYCOSIDE |
| P05AT0063 | aph(3')-IIIa | bin_2 | plasmid | root (UID1) (bin_2) | Enterococcus_faecium_EnGen0180.fna | NODE_589_length_1658_cov_135.447910 | 1658 | AMINOGLYCOSIDE |
| P05AT0063 | vanA | bin_1 | plasmid | o__Lactobacillales (UID544) (bin_1) | Enterococcus_faecium.fna | NODE_27_length_36046_cov_676.891528 | 36046 | GLYCOPEPTIDE |
| P05AT0063 | vanH-A | bin_1 | plasmid | o__Lactobacillales (UID544) (bin_1) | Enterococcus_faecium.fna | NODE_27_length_36046_cov_676.891528 | 36046 | GLYCOPEPTIDE |
| P05AT0063 | vanR-A | bin_1 | plasmid | o__Lactobacillales (UID544) (bin_1) | Enterococcus_faecium.fna | NODE_27_length_36046_cov_676.891528 | 36046 | GLYCOPEPTIDE |
| P05AT0063 | vanS-A | bin_1 | plasmid | o__Lactobacillales (UID544) (bin_1) | Enterococcus_faecium.fna | NODE_27_length_36046_cov_676.891528 | 36046 | GLYCOPEPTIDE |
| P05AT0063 | vanX-A | bin_1 | plasmid | o__Lactobacillales (UID544) (bin_1) | Enterococcus_faecium.fna | NODE_27_length_36046_cov_676.891528 | 36046 | GLYCOPEPTIDE |
| P05AT0063 | vanY-A | bin_1 | plasmid | o__Lactobacillales (UID544) (bin_1) | Enterococcus_faecium.fna | NODE_27_length_36046_cov_676.891528 | 36046 | GLYCOPEPTIDE |
| P05AT0063 | vanZ-A | bin_1 | plasmid | o__Lactobacillales (UID544) (bin_1) | Enterococcus_faecium.fna | NODE_27_length_36046_cov_676.891528 | 36046 | GLYCOPEPTIDE |
| P05AT0063 | eat(A) | bin_1 | plasmid | o__Lactobacillales (UID544) (bin_1) | Enterococcus_faecium.fna | NODE_23_length_44885_cov_450.839795 | 44885 | PLEUROMUTILIN |
| P05AT0063 | tet(M) | bin_2 | plasmid | root (UID1) (bin_2) | Enterococcus_faecium_EnGen0180.fna | NODE_83_length_11630_cov_38.830497 | 11630 | TETRACYCLINE |
| P05AT0063 | tet(S) | bin_1 | plasmid | o__Lactobacillales (UID544) (bin_1) | Enterococcus_faecium.fna | NODE_78_length_12346_cov_1270.410056 | 12346 | TETRACYCLINE |
| P10AT0324 | aadA1 | bin_1 | plasmid | k__Bacteria (UID203) (bin_1) | Klebsiella_pneumoniae_UCI_60.fna | NODE_158_length_7767_cov_101.315353 | 7767 | AMINOGLYCOSIDE |
| P10AT0324 | aadA5 | bin_2 | plasmid | f__Enterobacteriaceae (UID5103) (bin_2) | Escherichia_coli_LAU_EC8.fna | NODE_338_length_1610_cov_276.416720 | 1610 | AMINOGLYCOSIDE |
| P10AT0324 | aph(3')-Ia | bin_1 | plasmid | k__Bacteria (UID203) (bin_1) | Klebsiella_pneumoniae_UCI_60.fna | NODE_381_length_1145_cov_83.492661 | 1145 | AMINOGLYCOSIDE |
| P10AT0324 | aac(6')-Ib-cr5 | bin_2 | plasmid | f__Enterobacteriaceae (UID5103) (bin_2) | Escherichia_coli_LAU_EC8.fna | NODE_292_length_2293_cov_212.168007 | 2293 | AMINOGLYCOSIDE/QUINOLONE |
| P10AT0324 | blaDHA-1 | bin_1 | plasmid | k__Bacteria (UID203) (bin_1) | Klebsiella_pneumoniae_UCI_60.fna | NODE_161_length_7674_cov_45.660454 | 7674 | BETA-LACTAM |
| P10AT0324 | blaNDM-5 | bin_3 | plasmid | root (UID1) (bin_3) | Escherichia_coli_UMEA_3314_1.fna | NODE_190_length_5704_cov_89.238980 | 5704 | BETA-LACTAM |
| P10AT0324 | blaOXA-1 | bin_2 | plasmid | f__Enterobacteriaceae (UID5103) (bin_2) | Escherichia_coli_LAU_EC8.fna | NODE_292_length_2293_cov_212.168007 | 2293 | BETA-LACTAM |
| P10AT0324 | ble | bin_3 | plasmid | root (UID1) (bin_3) | Escherichia_coli_UMEA_3314_1.fna | NODE_190_length_5704_cov_89.238980 | 5704 | BLEOMYCIN |
| P10AT0324 | erm(B) | bin_2 | plasmid | f__Enterobacteriaceae (UID5103) (bin_2) | Escherichia_coli_LAU_EC8.fna | NODE_224_length_4175_cov_338.273786 | 4175 | MACROLIDE |
| P10AT0324 | mph(A) | bin_2 | plasmid | f__Enterobacteriaceae (UID5103) (bin_2) | Escherichia_coli_LAU_EC8.fna | NODE_225_length_4174_cov_723.752853 | 4174 | MACROLIDE |
| P10AT0324 | catA1 | bin_2 | plasmid | f__Enterobacteriaceae (UID5103) (bin_2) | Escherichia_coli_LAU_EC8.fna | NODE_205_length_5140_cov_289.069027 | 5140 | PHENICOL |
| P10AT0324 | catB3 | bin_2 | plasmid | f__Enterobacteriaceae (UID5103) (bin_2) | Escherichia_coli_LAU_EC8.fna | NODE_292_length_2293_cov_212.168007 | 2293 | PHENICOL |
| P10AT0324 | cmlA1 | bin_1 | plasmid | k__Bacteria (UID203) (bin_1) | Klebsiella_pneumoniae_UCI_60.fna | NODE_158_length_7767_cov_101.315353 | 7767 | PHENICOL |
| P10AT0324 | qacEdelta1 | bin_2 | plasmid | f__Enterobacteriaceae (UID5103) (bin_2) | Escherichia_coli_LAU_EC8.fna | NODE_361_length_1316_cov_745.006344 | 1316 | QUATERNARY AMMONIUM |
| P10AT0324 | qacL | bin_1 | plasmid | k__Bacteria (UID203) (bin_1) | Klebsiella_pneumoniae_UCI_60.fna | NODE_158_length_7767_cov_101.315353 | 7767 | QUATERNARY AMMONIUM |
| P10AT0324 | qnrB4 | bin_1 | plasmid | k__Bacteria (UID203) (bin_1) | Klebsiella_pneumoniae_UCI_60.fna | NODE_161_length_7674_cov_45.660454 | 7674 | QUINOLONE |
| P10AT0324 | qnrS13 | bin_1 | plasmid | k__Bacteria (UID203) (bin_1) | Klebsiella_pneumoniae_UCI_60.fna | NODE_244_length_3518_cov_476.626336 | 3518 | QUINOLONE |
| P10AT0324 | sul1 | bin_2 | plasmid | f__Enterobacteriaceae (UID5103) (bin_2) | Escherichia_coli_LAU_EC8.fna | NODE_361_length_1316_cov_745.006344 | 1316 | SULFONAMIDE |
| P10AT0324 | sul3 | bin_1 | plasmid | k__Bacteria (UID203) (bin_1) | Klebsiella_pneumoniae_UCI_60.fna | NODE_158_length_7767_cov_101.315353 | 7767 | SULFONAMIDE |
| P10AT0324 | tet(A) | bin_1 | plasmid | k__Bacteria (UID203) (bin_1) | Klebsiella_pneumoniae_UCI_60.fna | NODE_216_length_4339_cov_146.093137 | 4339 | TETRACYCLINE |
| P10AT0324 | tet(B) | bin_2 | plasmid | f__Enterobacteriaceae (UID5103) (bin_2) | Escherichia_coli_LAU_EC8.fna | NODE_226_length_4164_cov_258.233147 | 4164 | TETRACYCLINE |
| P10AT0324 | dfrA12 | bin_3 | plasmid | root (UID1) (bin_3) | Escherichia_coli_UMEA_3314_1.fna | NODE_395_length_1023_cov_90.989669 | 1023 | TRIMETHOPRIM |
| P10AT0324 | dfrA17 | bin_2 | plasmid | f__Enterobacteriaceae (UID5103) (bin_2) | Escherichia_coli_LAU_EC8.fna | NODE_338_length_1610_cov_276.416720 | 1610 | TRIMETHOPRIM |
| P24BT0081 | blaDHA | bin_2 | plasmid | root (UID1) (bin_2) | Escherichia_coli_BIDMC_49a.fna | NODE_191_length_2405_cov_6.549787 | 2405 | BETA-LACTAM |
| P24BT0081 | erm(B) | bin_2 | plasmid | root (UID1) (bin_2) | Escherichia_coli_BIDMC_49a.fna | NODE_102_length_4174_cov_7.510318 | 4174 | MACROLIDE |
| P24BT0081 | qnrB4 | bin_2 | plasmid | root (UID1) (bin_2) | Escherichia_coli_BIDMC_49a.fna | NODE_71_length_5376_cov_6.877843 | 5376 | QUINOLONE |
| P24BT0081 | dfrA17 | bin_2 | plasmid | root (UID1) (bin_2) | Escherichia_coli_BIDMC_49a.fna | NODE_398_length_1060_cov_5.542289 | 1060 | TRIMETHOPRIM |
| P31AT0103 | aac(3)-IIe | bin_1 | plasmid | k__Bacteria (UID203) (bin_1) | Klebsiella_pneumoniae.fna | NODE_371_length_2704_cov_66.447716 | 2704 | AMINOGLYCOSIDE |
| P31AT0103 | aadA2 | bin_1 | plasmid | k__Bacteria (UID203) (bin_1) | Klebsiella_pneumoniae.fna | NODE_187_length_9478_cov_1258.296084 | 9478 | AMINOGLYCOSIDE |
| P31AT0103 | aadA5 | bin_1 | plasmid | k__Bacteria (UID203) (bin_1) | Klebsiella_pneumoniae.fna | NODE_586_length_1608_cov_69.401803 | 1608 | AMINOGLYCOSIDE |
| P31AT0103 | aph(3'')-Ib | bin_1 | plasmid | k__Bacteria (UID203) (bin_1) | Klebsiella_pneumoniae.fna | NODE_317_length_3486_cov_44.015447 | 3486 | AMINOGLYCOSIDE |
| P31AT0103 | aph(6)-Id | bin_1 | plasmid | k__Bacteria (UID203) (bin_1) | Klebsiella_pneumoniae.fna | NODE_317_length_3486_cov_44.015447 | 3486 | AMINOGLYCOSIDE |
| P31AT0103 | rmtB1 | bin_1 | plasmid | k__Bacteria (UID203) (bin_1) | Klebsiella_pneumoniae.fna | NODE_460_length_2066_cov_240.039284 | 2066 | AMINOGLYCOSIDE |
| P31AT0103 | aac(6')-Ib-cr5 | bin_1 | plasmid | k__Bacteria (UID203) (bin_1) | Klebsiella_pneumoniae.fna | NODE_421_length_2270_cov_74.034312 | 2270 | AMINOGLYCOSIDE/QUINOLONE |
| P31AT0103 | blaCMY-145 | bin_2 | plasmid | f__Enterobacteriaceae (UID5103) (bin_2) | Escherichia_coli.fna | NODE_112_length_23139_cov_982.498137 | 23139 | BETA-LACTAM |
| P31AT0103 | blaCTX-M-15 | bin_1 | plasmid | k__Bacteria (UID203) (bin_1) | Klebsiella_pneumoniae.fna | NODE_310_length_3616_cov_113.024431 | 3616 | BETA-LACTAM |
| P31AT0103 | blaNDM-5 | bin_1 | plasmid | k__Bacteria (UID203) (bin_1) | Klebsiella_pneumoniae.fna | NODE_187_length_9478_cov_1258.296084 | 9478 | BETA-LACTAM |
| P31AT0103 | blaOXA-1 | bin_1 | plasmid | k__Bacteria (UID203) (bin_1) | Klebsiella_pneumoniae.fna | NODE_421_length_2270_cov_74.034312 | 2270 | BETA-LACTAM |
| P31AT0103 | blaOXA-232 | bin_1 | plasmid | k__Bacteria (UID203) (bin_1) | Klebsiella_pneumoniae.fna | NODE_526_length_1759_cov_2526.975352 | 1759 | BETA-LACTAM |
| P31AT0103 | blaTEM | bin_1 | plasmid | k__Bacteria (UID203) (bin_1) | Klebsiella_pneumoniae.fna | NODE_632_length_1502_cov_274.111956 | 1502 | BETA-LACTAM |
| P31AT0103 | ble | bin_1 | plasmid | k__Bacteria (UID203) (bin_1) | Klebsiella_pneumoniae.fna | NODE_187_length_9478_cov_1258.296084 | 9478 | BLEOMYCIN |
| P31AT0103 | erm(B) | bin_1 | plasmid | k__Bacteria (UID203) (bin_1) | Klebsiella_pneumoniae.fna | NODE_285_length_4173_cov_327.092035 | 4173 | MACROLIDE |
| P31AT0103 | mph(A) | bin_1 | plasmid | k__Bacteria (UID203) (bin_1) | Klebsiella_pneumoniae.fna | NODE_286_length_4168_cov_926.066132 | 4168 | MACROLIDE |
| P31AT0103 | catA1 | bin_1 | plasmid | k__Bacteria (UID203) (bin_1) | Klebsiella_pneumoniae.fna | NODE_239_length_6284_cov_134.877669 | 6284 | PHENICOL |
| P31AT0103 | catB3 | bin_1 | plasmid | k__Bacteria (UID203) (bin_1) | Klebsiella_pneumoniae.fna | NODE_421_length_2270_cov_74.034312 | 2270 | PHENICOL |
| P31AT0103 | qacEdelta1 | bin_1 | plasmid | k__Bacteria (UID203) (bin_1) | Klebsiella_pneumoniae.fna | NODE_187_length_9478_cov_1258.296084 | 9478 | QUATERNARY AMMONIUM |
| P31AT0103 | qnrS1 | bin_2 | plasmid | f__Enterobacteriaceae (UID5103) (bin_2) | Escherichia_coli.fna | NODE_347_length_3013_cov_455.911089 | 3013 | QUINOLONE |
| P31AT0103 | qnrS1 | bin_1 | plasmid | k__Bacteria (UID203) (bin_1) | Klebsiella_pneumoniae.fna | NODE_347_length_3013_cov_455.911089 | 3013 | QUINOLONE |
| P31AT0103 | sul1 | bin_1 | plasmid | k__Bacteria (UID203) (bin_1) | Klebsiella_pneumoniae.fna | NODE_187_length_9478_cov_1258.296084 | 9478 | SULFONAMIDE |
| P31AT0103 | sul2 | bin_1 | plasmid | k__Bacteria (UID203) (bin_1) | Klebsiella_pneumoniae.fna | NODE_317_length_3486_cov_44.015447 | 3486 | SULFONAMIDE |
| P31AT0103 | tet(A) | bin_2 | plasmid | f__Enterobacteriaceae (UID5103) (bin_2) | Escherichia_coli.fna | NODE_288_length_4030_cov_732.532327 | 4030 | TETRACYCLINE |
| P31AT0103 | tet(B) | bin_1 | plasmid | k__Bacteria (UID203) (bin_1) | Klebsiella_pneumoniae.fna | NODE_406_length_2421_cov_178.202451 | 2421 | TETRACYCLINE |
| P31AT0103 | dfrA12 | bin_1 | plasmid | k__Bacteria (UID203) (bin_1) | Klebsiella_pneumoniae.fna | NODE_187_length_9478_cov_1258.296084 | 9478 | TRIMETHOPRIM |
| P31AT0103 | dfrA17 | bin_1 | plasmid | k__Bacteria (UID203) (bin_1) | Klebsiella_pneumoniae.fna | NODE_586_length_1608_cov_69.401803 | 1608 | TRIMETHOPRIM |
| P44AT0042 | blaTEM-1 | bin_1 | plasmid | f__Enterobacteriaceae (UID5103) (bin_1) | Klebsiella_pneumoniae.fna | NODE_21_length_36103_cov_607.786951 | 36103 | BETA-LACTAM |
| P44AT0042 | tet(D) | bin_1 | plasmid | f__Enterobacteriaceae (UID5103) (bin_1) | Klebsiella_pneumoniae.fna | NODE_21_length_36103_cov_607.786951 | 36103 | TETRACYCLINE |
| P53AT0274 | aadA2 | bin_1 | plasmid | f__Enterobacteriaceae (UID5103) (bin_1) | Klebsiella_pneumoniae.fna | NODE_172_length_1811_cov_326.653189 | 1811 | AMINOGLYCOSIDE |
| P53AT0274 | aadA5 | bin_2 | plasmid | f__Enterobacteriaceae (UID5103) (bin_2) | Escherichia_coli_908555.fna | NODE_178_length_1610_cov_621.870740 | 1610 | AMINOGLYCOSIDE |
| P53AT0274 | rmtB1 | bin_1 | plasmid | f__Enterobacteriaceae (UID5103) (bin_1) | Klebsiella_pneumoniae.fna | NODE_145_length_4057_cov_310.020490 | 4057 | AMINOGLYCOSIDE |
| P53AT0274 | aac(6')-Ib-cr5 | bin_2 | plasmid | f__Enterobacteriaceae (UID5103) (bin_2) | Escherichia_coli_908555.fna | NODE_161_length_2816_cov_753.087287 | 2816 | AMINOGLYCOSIDE/QUINOLONE |
| P53AT0274 | aac(6')-Ib-cr5 | bin_1 | plasmid | f__Enterobacteriaceae (UID5103) (bin_1) | Klebsiella_pneumoniae.fna | NODE_150_length_3317_cov_407.725628 | 3317 | AMINOGLYCOSIDE/QUINOLONE |
| P53AT0274 | blaCMY-42 | bin_2 | plasmid | f__Enterobacteriaceae (UID5103) (bin_2) | Escherichia_coli_908555.fna | NODE_87_length_28681_cov_361.184518 | 28681 | BETA-LACTAM |
| P53AT0274 | blaCTX-M-15 | bin_1 | plasmid | f__Enterobacteriaceae (UID5103) (bin_1) | Klebsiella_pneumoniae.fna | NODE_174_length_1728_cov_353.098027 | 1728 | BETA-LACTAM |
| P53AT0274 | blaNDM-1 | bin_1 | plasmid | f__Enterobacteriaceae (UID5103) (bin_1) | Klebsiella_pneumoniae.fna | NODE_176_length_1637_cov_634.087863 | 1637 | BETA-LACTAM |
| P53AT0274 | blaOXA-1 | bin_2 | plasmid | f__Enterobacteriaceae (UID5103) (bin_2) | Escherichia_coli_908555.fna | NODE_161_length_2816_cov_753.087287 | 2816 | BETA-LACTAM |
| P53AT0274 | blaOXA-232 | bin_1 | plasmid | f__Enterobacteriaceae (UID5103) (bin_1) | Klebsiella_pneumoniae.fna | NODE_162_length_2812_cov_4502.956837 | 2812 | BETA-LACTAM |
| P53AT0274 | blaTEM-1 | bin_1 | plasmid | f__Enterobacteriaceae (UID5103) (bin_1) | Klebsiella_pneumoniae.fna | NODE_145_length_4057_cov_310.020490 | 4057 | BETA-LACTAM |
| P53AT0274 | ble | bin_1 | plasmid | f__Enterobacteriaceae (UID5103) (bin_1) | Klebsiella_pneumoniae.fna | NODE_176_length_1637_cov_634.087863 | 1637 | BLEOMYCIN |
| P53AT0274 | erm(B) | bin_2 | plasmid | f__Enterobacteriaceae (UID5103) (bin_2) | Escherichia_coli_908555.fna | NODE_144_length_4174_cov_1147.307356 | 4174 | MACROLIDE |
| P53AT0274 | mph(A) | bin_2 | plasmid | f__Enterobacteriaceae (UID5103) (bin_2) | Escherichia_coli_908555.fna | NODE_149_length_3344_cov_768.149894 | 3344 | MACROLIDE |
| P53AT0274 | catB | bin_1 | plasmid | f__Enterobacteriaceae (UID5103) (bin_1) | Klebsiella_pneumoniae.fna | NODE_150_length_3317_cov_407.725628 | 3317 | PHENICOL |
| P53AT0274 | catB3 | bin_2 | plasmid | f__Enterobacteriaceae (UID5103) (bin_2) | Escherichia_coli_908555.fna | NODE_161_length_2816_cov_753.087287 | 2816 | PHENICOL |
| P53AT0274 | qacEdelta1 | bin_2 | plasmid | f__Enterobacteriaceae (UID5103) (bin_2) | Escherichia_coli_908555.fna | NODE_198_length_1043_cov_907.814777 | 1043 | QUATERNARY AMMONIUM |
| P53AT0274 | qnrB1 | bin_1 | plasmid | f__Enterobacteriaceae (UID5103) (bin_1) | Klebsiella_pneumoniae.fna | NODE_173_length_1759_cov_392.288146 | 1759 | QUINOLONE |
| P53AT0274 | qnrS1 | bin_2 | plasmid | f__Enterobacteriaceae (UID5103) (bin_2) | Escherichia_coli_908555.fna | NODE_135_length_5920_cov_392.500085 | 5920 | QUINOLONE |
| P53AT0274 | arr | bin_2 | plasmid | f__Enterobacteriaceae (UID5103) (bin_2) | Escherichia_coli_908555.fna | NODE_161_length_2816_cov_753.087287 | 2816 | RIFAMYCIN |
| P53AT0274 | sul1 | bin_2 | plasmid | f__Enterobacteriaceae (UID5103) (bin_2) | Escherichia_coli_908555.fna | NODE_198_length_1043_cov_907.814777 | 1043 | SULFONAMIDE |
| P53AT0274 | tet(B) | bin_2 | plasmid | f__Enterobacteriaceae (UID5103) (bin_2) | Escherichia_coli_908555.fna | NODE_155_length_2975_cov_347.798288 | 2975 | TETRACYCLINE |
| P53AT0274 | dfrA12 | bin_1 | plasmid | f__Enterobacteriaceae (UID5103) (bin_1) | Klebsiella_pneumoniae.fna | NODE_172_length_1811_cov_326.653189 | 1811 | TRIMETHOPRIM |
| P53AT0274 | dfrA17 | bin_2 | plasmid | f__Enterobacteriaceae (UID5103) (bin_2) | Escherichia_coli_908555.fna | NODE_178_length_1610_cov_621.870740 | 1610 | TRIMETHOPRIM |
| P53AT0536 | aadA2 | bin_1 | plasmid | f__Enterobacteriaceae (UID5103) (bin_1) | Klebsiella_pneumoniae.fna | NODE_64_length_6342_cov_11178.931446 | 6342 | AMINOGLYCOSIDE |
| P53AT0536 | blaCMY | bin_1 | plasmid | f__Enterobacteriaceae (UID5103) (bin_1) | Klebsiella_pneumoniae.fna | NODE_53_length_24847_cov_523.413117 | 24847 | BETA-LACTAM |
| P53AT0536 | blaNDM-5 | bin_1 | plasmid | f__Enterobacteriaceae (UID5103) (bin_1) | Klebsiella_pneumoniae.fna | NODE_70_length_3552_cov_2757.059480 | 3552 | BETA-LACTAM |
| P53AT0536 | ble | bin_1 | plasmid | f__Enterobacteriaceae (UID5103) (bin_1) | Klebsiella_pneumoniae.fna | NODE_70_length_3552_cov_2757.059480 | 3552 | BLEOMYCIN |
| P53AT0536 | mph(A) | bin_1 | plasmid | f__Enterobacteriaceae (UID5103) (bin_1) | Klebsiella_pneumoniae.fna | NODE_68_length_4222_cov_871.765059 | 4222 | MACROLIDE |
| P53AT0536 | qacEdelta1 | bin_1 | plasmid | f__Enterobacteriaceae (UID5103) (bin_1) | Klebsiella_pneumoniae.fna | NODE_64_length_6342_cov_11178.931446 | 6342 | QUATERNARY AMMONIUM |
| P53AT0536 | sul1 | bin_1 | plasmid | f__Enterobacteriaceae (UID5103) (bin_1) | Klebsiella_pneumoniae.fna | NODE_64_length_6342_cov_11178.931446 | 6342 | SULFONAMIDE |
| P53AT0536 | tet(A) | bin_1 | plasmid | f__Enterobacteriaceae (UID5103) (bin_1) | Klebsiella_pneumoniae.fna | NODE_63_length_10107_cov_12672.042579 | 10107 | TETRACYCLINE |
| P53AT0536 | dfrA12 | bin_1 | plasmid | f__Enterobacteriaceae (UID5103) (bin_1) | Klebsiella_pneumoniae.fna | NODE_64_length_6342_cov_11178.931446 | 6342 | TRIMETHOPRIM |
| P61AT0042 | aadA5 | bin_1 | plasmid | f__Enterobacteriaceae (UID5103) (bin_1) | Escherichia_coli_CUMT8.fna | NODE_414_length_1658_cov_418.863381 | 1658 | AMINOGLYCOSIDE |
| P61AT0042 | mef(A) | bin_2 | plasmid | o__Lactobacillales (UID544) (bin_2) | Enterococcus_hirae_ATCC_9790.fna | NODE_77_length_22114_cov_18.410309 | 22114 | MACROLIDE |
| P61AT0042 | sul2 | bin_1 | plasmid | f__Enterobacteriaceae (UID5103) (bin_1) | Escherichia_coli_CUMT8.fna | NODE_235_length_6153_cov_374.449820 | 6153 | SULFONAMIDE |
| P61AT0042 | tet(A) | bin_1 | plasmid | f__Enterobacteriaceae (UID5103) (bin_1) | Escherichia_coli_CUMT8.fna | NODE_252_length_5490_cov_1345.650966 | 5490 | TETRACYCLINE |
| P61AT0042 | tet(L) | bin_2 | plasmid | o__Lactobacillales (UID544) (bin_2) | Enterococcus_hirae_ATCC_9790.fna | NODE_77_length_22114_cov_18.410309 | 22114 | TETRACYCLINE |
| P61AT0042 | tet(M) | bin_2 | plasmid | o__Lactobacillales (UID544) (bin_2) | Enterococcus_hirae_ATCC_9790.fna | NODE_77_length_22114_cov_18.410309 | 22114 | TETRACYCLINE |
| P61AT0042 | dfrA17 | bin_1 | plasmid | f__Enterobacteriaceae (UID5103) (bin_1) | Escherichia_coli_CUMT8.fna | NODE_414_length_1658_cov_418.863381 | 1658 | TRIMETHOPRIM |
| P75BT0061 | aac(3)-IIe | bin_1 | plasmid | f__Enterobacteriaceae (UID5103) (bin_1) | Escherichia_coli_UCI_53.fna | NODE_121_length_2708_cov_545.420279 | 2708 | AMINOGLYCOSIDE |
| P75BT0061 | aadA2 | bin_1 | plasmid | f__Enterobacteriaceae (UID5103) (bin_1) | Escherichia_coli_UCI_53.fna | NODE_75_length_9665_cov_18.711342 | 9665 | AMINOGLYCOSIDE |
| P75BT0061 | aac(6')-Ib-cr5 | bin_1 | plasmid | f__Enterobacteriaceae (UID5103) (bin_1) | Escherichia_coli_UCI_53.fna | NODE_127_length_2294_cov_573.087986 | 2294 | AMINOGLYCOSIDE/QUINOLONE |
| P75BT0061 | blaCMY-145 | bin_1 | plasmid | f__Enterobacteriaceae (UID5103) (bin_1) | Escherichia_coli_UCI_53.fna | NODE_63_length_16061_cov_8.059228 | 16061 | BETA-LACTAM |
| P75BT0061 | blaCTX-M-15 | bin_1 | plasmid | f__Enterobacteriaceae (UID5103) (bin_1) | Escherichia_coli_UCI_53.fna | NODE_100_length_4872_cov_594.078680 | 4872 | BETA-LACTAM |
| P75BT0061 | blaNDM-5 | bin_1 | plasmid | f__Enterobacteriaceae (UID5103) (bin_1) | Escherichia_coli_UCI_53.fna | NODE_75_length_9665_cov_18.711342 | 9665 | BETA-LACTAM |
| P75BT0061 | blaOXA-1 | bin_1 | plasmid | f__Enterobacteriaceae (UID5103) (bin_1) | Escherichia_coli_UCI_53.fna | NODE_127_length_2294_cov_573.087986 | 2294 | BETA-LACTAM |
| P75BT0061 | ble | bin_1 | plasmid | f__Enterobacteriaceae (UID5103) (bin_1) | Escherichia_coli_UCI_53.fna | NODE_75_length_9665_cov_18.711342 | 9665 | BLEOMYCIN |
| P75BT0061 | mph(A) | bin_1 | plasmid | f__Enterobacteriaceae (UID5103) (bin_1) | Escherichia_coli_UCI_53.fna | NODE_105_length_4050_cov_547.385232 | 4050 | MACROLIDE |
| P75BT0061 | catB3 | bin_1 | plasmid | f__Enterobacteriaceae (UID5103) (bin_1) | Escherichia_coli_UCI_53.fna | NODE_127_length_2294_cov_573.087986 | 2294 | PHENICOL |
| P75BT0061 | qacEdelta1 | bin_1 | plasmid | f__Enterobacteriaceae (UID5103) (bin_1) | Escherichia_coli_UCI_53.fna | NODE_75_length_9665_cov_18.711342 | 9665 | QUATERNARY AMMONIUM |
| P75BT0061 | sul1 | bin_1 | plasmid | f__Enterobacteriaceae (UID5103) (bin_1) | Escherichia_coli_UCI_53.fna | NODE_75_length_9665_cov_18.711342 | 9665 | SULFONAMIDE |
| P75BT0061 | tet(A) | bin_1 | plasmid | f__Enterobacteriaceae (UID5103) (bin_1) | Escherichia_coli_UCI_53.fna | NODE_61_length_16658_cov_616.753779 | 16658 | TETRACYCLINE |
| P75BT0061 | dfrA12 | bin_1 | plasmid | f__Enterobacteriaceae (UID5103) (bin_1) | Escherichia_coli_UCI_53.fna | NODE_75_length_9665_cov_18.711342 | 9665 | TRIMETHOPRIM |
| P81BT0071 | aac(3)-IIe | bin_2 | plasmid | root (UID1) (bin_2) | Escherichia_coli_LR09.fna | NODE_257_length_2707_cov_22.564857 | 2707 | AMINOGLYCOSIDE |
| P81BT0071 | aadA2 | bin_1 | plasmid | f__Enterobacteriaceae (UID5103) (bin_1) | Escherichia_coli.fna | NODE_103_length_9781_cov_690.322640 | 9781 | AMINOGLYCOSIDE |
| P81BT0071 | aadA5 | bin_2 | plasmid | root (UID1) (bin_2) | Escherichia_coli_LR09.fna | NODE_361_length_1608_cov_36.948487 | 1608 | AMINOGLYCOSIDE |
| P81BT0071 | aac(6')-Ib-cr5 | bin_1 | plasmid | f__Enterobacteriaceae (UID5103) (bin_1) | Escherichia_coli.fna | NODE_294_length_2292_cov_620.851587 | 2292 | AMINOGLYCOSIDE/QUINOLONE |
| P81BT0071 | blaCMY-42 | bin_2 | plasmid | root (UID1) (bin_2) | Escherichia_coli_LR09.fna | NODE_270_length_2540_cov_18.444668 | 2540 | BETA-LACTAM |
| P81BT0071 | blaCTX-M-15 | bin_1 | plasmid | f__Enterobacteriaceae (UID5103) (bin_1) | Escherichia_coli.fna | NODE_191_length_4164_cov_651.528839 | 4164 | BETA-LACTAM |
| P81BT0071 | blaNDM-5 | bin_1 | plasmid | f__Enterobacteriaceae (UID5103) (bin_1) | Escherichia_coli.fna | NODE_103_length_9781_cov_690.322640 | 9781 | BETA-LACTAM |
| P81BT0071 | blaOXA-1 | bin_1 | plasmid | f__Enterobacteriaceae (UID5103) (bin_1) | Escherichia_coli.fna | NODE_294_length_2292_cov_620.851587 | 2292 | BETA-LACTAM |
| P81BT0071 | blaTEM-1 | bin_2 | plasmid | root (UID1) (bin_2) | Escherichia_coli_LR09.fna | NODE_216_length_3446_cov_20.166028 | 3446 | BETA-LACTAM |
| P81BT0071 | ble | bin_1 | plasmid | f__Enterobacteriaceae (UID5103) (bin_1) | Escherichia_coli.fna | NODE_103_length_9781_cov_690.322640 | 9781 | BLEOMYCIN |
| P81BT0071 | erm(B) | bin_1 | plasmid | f__Enterobacteriaceae (UID5103) (bin_1) | Escherichia_coli.fna | NODE_190_length_4173_cov_628.492958 | 4173 | MACROLIDE |
| P81BT0071 | mph(A) | bin_1 | plasmid | f__Enterobacteriaceae (UID5103) (bin_1) | Escherichia_coli.fna | NODE_192_length_4146_cov_1275.933757 | 4146 | MACROLIDE |
| P81BT0071 | catA1 | bin_2 | plasmid | root (UID1) (bin_2) | Escherichia_coli_LR09.fna | NODE_167_length_5141_cov_15.180495 | 5141 | PHENICOL |
| P81BT0071 | catB3 | bin_1 | plasmid | f__Enterobacteriaceae (UID5103) (bin_1) | Escherichia_coli.fna | NODE_294_length_2292_cov_620.851587 | 2292 | PHENICOL |
| P81BT0071 | qacEdelta1 | bin_1 | plasmid | f__Enterobacteriaceae (UID5103) (bin_1) | Escherichia_coli.fna | NODE_103_length_9781_cov_690.322640 | 9781 | QUATERNARY AMMONIUM |
| P81BT0071 | sul1 | bin_1 | plasmid | f__Enterobacteriaceae (UID5103) (bin_1) | Escherichia_coli.fna | NODE_103_length_9781_cov_690.322640 | 9781 | SULFONAMIDE |
| P81BT0071 | tet(B) | bin_2 | plasmid | root (UID1) (bin_2) | Escherichia_coli_LR09.fna | NODE_157_length_5688_cov_28.839340 | 5688 | TETRACYCLINE |
| P81BT0071 | dfrA12 | bin_1 | plasmid | f__Enterobacteriaceae (UID5103) (bin_1) | Escherichia_coli.fna | NODE_103_length_9781_cov_690.322640 | 9781 | TRIMETHOPRIM |
| P81BT0071 | dfrA17 | bin_2 | plasmid | root (UID1) (bin_2) | Escherichia_coli_LR09.fna | NODE_361_length_1608_cov_36.948487 | 1608 | TRIMETHOPRIM |

**Extended data 9: AST data for select enteric MDR bacteria identified as *E.coli*, *Klebsiella pneumoniae* or *Enterococcus faecium* isolated from stool, and corresponding AMR genes from enriched stool sample resistomes.**

**
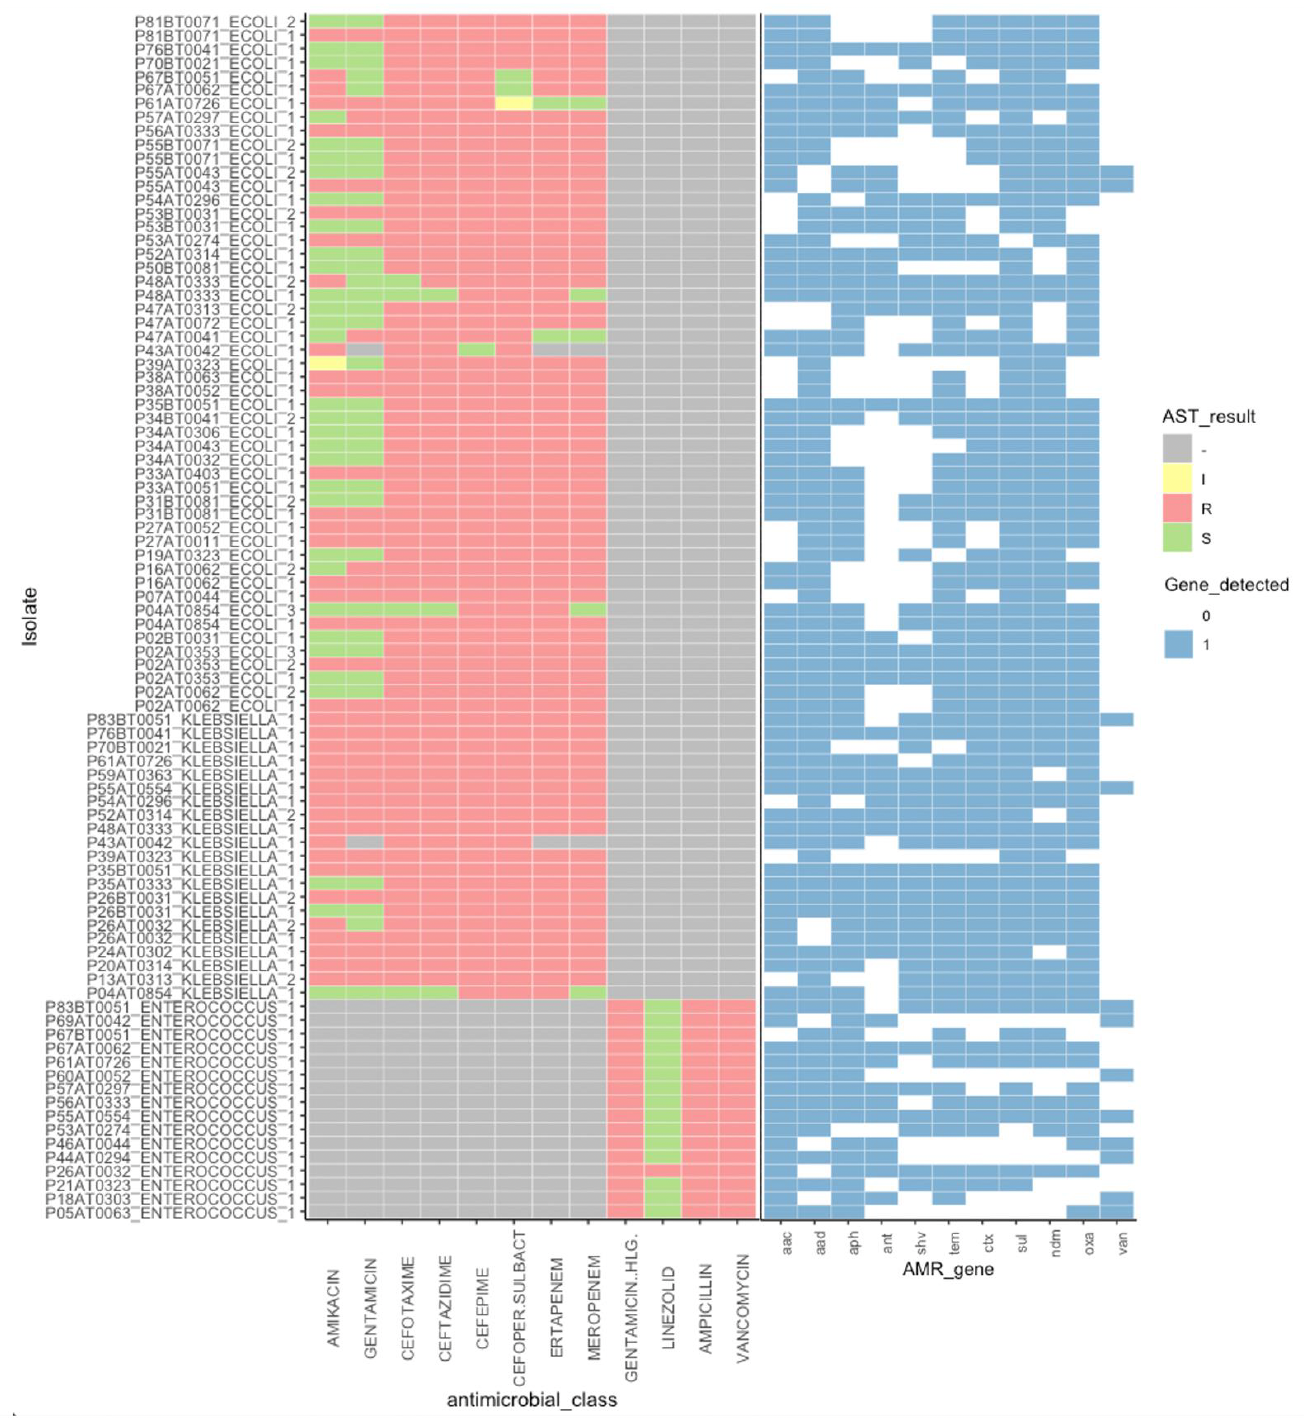
**

**Antimicrobial susceptibility testing results (left) and non-efflux AMR genes which could be linked with mediating resistance to the antimicrobials tested against (right).** AST results: S – sensitive, I – intermediate, R – resistant. Greyed out boxes indicate that the isolates were not tested against that antimicrobial. Blue coloured boxes indicate that the AMR gene was present, and white denotes absence. The figure shows antibiograms for each of the 90 isolates classified as MDR, grouped by organism, next to the most common AMR genes that could be associated with the resistance phenotype. Note that the AMR gene detection was conducted using metagenomic scaffolds constructed from the enriched microbiome data instead of the consensus genome bins, so the resistome is repeated in cases where two or three MDR isolates were detected in the same sample. Furthermore, while the AMR genes depicted were selected for their prominent roles in conferring resistance to the depicted antimicrobial classes, these genes do not constitute an exhaustive list and neither does their presence alone guarantee expression of the corresponding phenotype. The 90 enteric MDR isolates were detected across 57 unique samples from 41 patients, suggesting that over half of the patients (50.6%) included in the HSCT cohort had at least one MDR organism isolated from their stool during the transplant timeline. Five samples (P02AT0353, P04AT0854, P26AT0032, P48AT0333 and P61AT0726) each had three MDR organisms isolated from them, all collected post-HSCT. In general, isolated *Klebsiella* spp. possessed phenotypic resistance to a broader range of antimicrobial classes, also reflected in the resistomes of samples containing the organism. At least one aminoglycoside resistance gene was identified in all 90 samples, despite most *E. coli* showing susceptibility to amikacin and gentamicin.

**Extended data 10: Antimicrobial sensitivity and AMR gene profiles for 5 BSI isolates that likely translocated from the gut**

|  | **P02AT005BP2** | **P05AT014BA1** | **P14AT043BA1** | **P44AT012BA1** | **P55BT045BA1** |
| --- | --- | --- | --- | --- | --- |
|  | ***E.coli*** | ***E.faecium*** | ***K.pneumoniae*** | ***P.aeruginosa*** | ***K.pneumoniae*** |
| **Antimicobials tested** | **AST** | | | | |
| Piperacillin/tazobactam | R |  | Participant died before AST was performed | R | R |
| Netilmicin | R |  | R | R |
| Meropenem | R |  | R | R |
| Gentamicin | R | R |  | R |
| Ciprofloxacin |  |  |  | R |
| Amikacin | R |  | R | R |
| Cefoperazone/sulbactam | R |  | R | R |
| Ertapenem |  |  |  | R |
| Cefotaxime |  |  |  | R |
| Ceftazidime | R |  | R | R |
| Tigecycline | R |  |  |  |
| Cefepime |  |  | R |  |
| Levofloxacin |  | R | R |  |
| Aztreonam |  |  | R |  |
| Ampicillin |  | R |  |  |
| Vancomycin |  | R |  |  |
| Linezolid |  | S |  |  |
| **AMR gene drug classes** | **AMR gene detection** | | | | |
| Aminoglycoside | 2 | 5 | 4 | 7 | 3 |
| Cephalosporin | 1 | 0 | 0 | 1 | 0 |
| Cephalosporin; penam | 0 | 0 | 1 | 0 | 1 |
| Cephamycin | 1 | 0 | 0 | 0 | 0 |
| Diaminopyrimidine | 1 | 1 | 1 | 1 | 1 |
| Fluoroquinolone | 1 | 0 | 1 | 1 | 1 |
| Glycopeptide | 0 | 1 | 0 | 0 | 0 |
| Glycylcycline; tetracycline | 0 | 1 | 0 | 0 | 0 |
| Lincosamide | 0 | 2 | 0 | 0 | 1 |
| Macrolide | 1 | 2 | 2 | 0 | 1 |
| Macrolide; streptogramin | 0 | 1 | 1 | 1 | 0 |
| Multidrug | 4 | 4 | 4 | 5 | 5 |
| Nucleoside | 0 | 1 | 0 | 0 | 0 |
| Peptide | 4 | 0 | 3 | 1 | 3 |
| Phenicol | 0 | 1 | 1 | 1 | 1 |
| Phosphonic acid | 0 | 1 | 1 | 1 | 1 |
| Rifamycin | 0 | 0 | 1 | 0 | 1 |
| Sulfonamide | 1 | 1 | 1 | 2 | 1 |
| Tetracycline | 0 | 3 | 1 | 0 | 0 |
